# Supplementary material for: Facile synthesis of a hollow Ni–Fe–B nanochain and its enhanced catalytic activity for hydrogen generation from NaBH4hydrolysis
Source: Royal Society of Chemistry journal article supplement (doi:10.1039/c8ra03848a), 2018-01-01
Supplement: c8ra03848a1.pdf [file c8ra03848a1.pdf]

*Supplementary information for*

## Facile synthesis of hollow Ni-Fe-B nanochain and its enhanced catalytic activity for hydrogen generation from NaBH<sub>4</sub> hydrolysis

Jie Guo, Yongjiang Hou\*, Bo Li

School of Environmental Science and Engineering, Hebei University of Science and Technology,  
Shi Jiazhuang 050018, China

\*Corresponding author. houyongjiang122@163.com

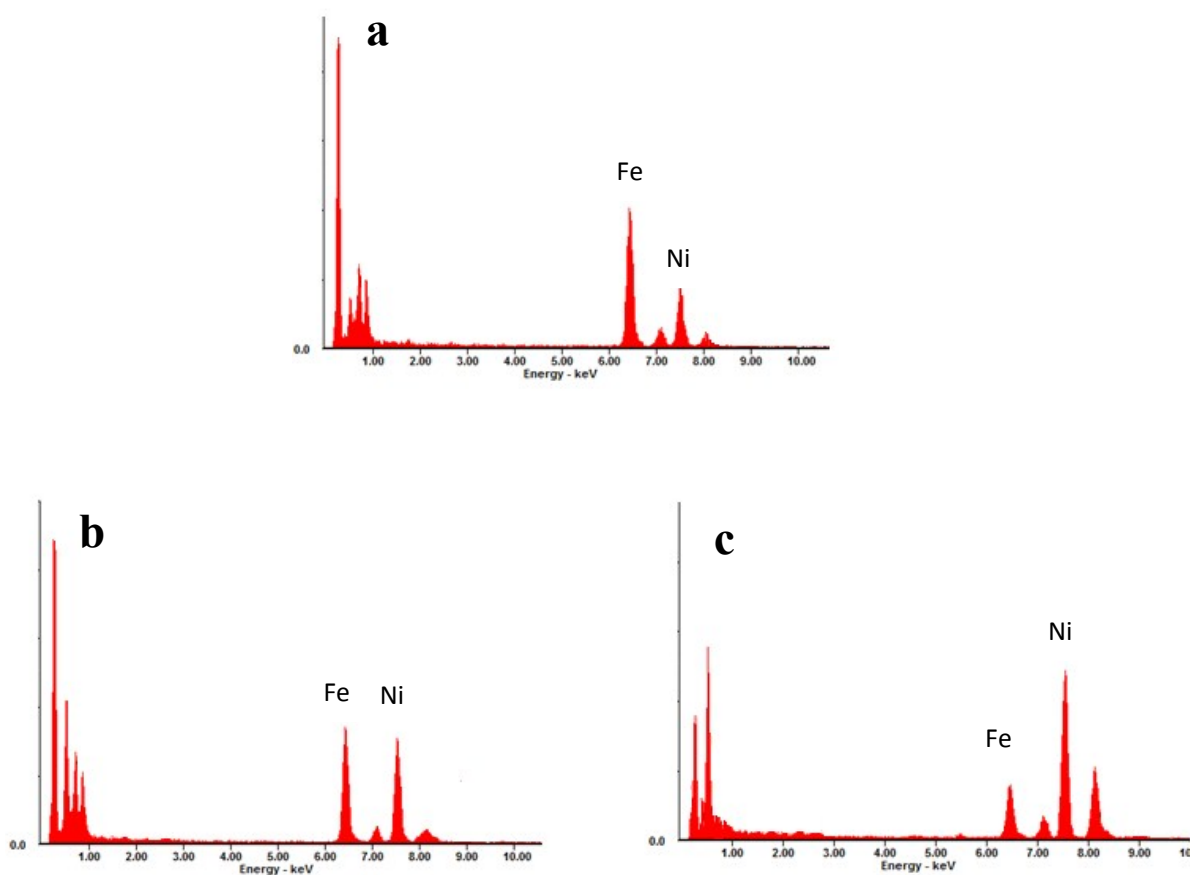

Figure S1 EDX images of (a) Ni-Fe-B-30, (b) Ni-Fe-B-60 and (c) Ni-Fe-B-120 samples.

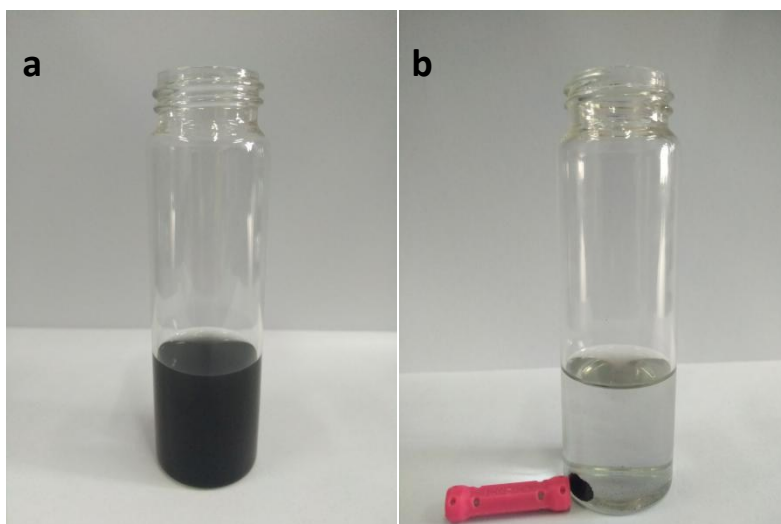

Figure S2 (a) Ni-Fe-B-60 sample dispersed in water, (b) Ni-Fe-B-60 sample effect by the magnet strip.
